# Supplementary material
Source: Springer Nature journal article supplement (https://www.springermedizin.de/resource/supplementary/12865_2008_251_MOESM2_ESM.pdf/9427602)

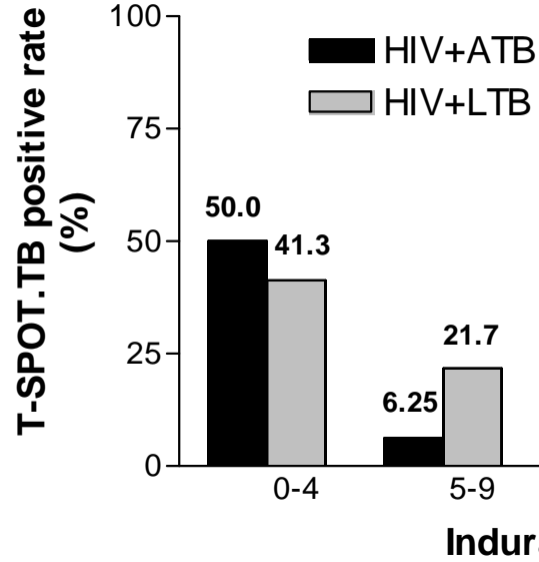

Supplement: MOESM2 [file 9427602]
